# Psychiatric Services

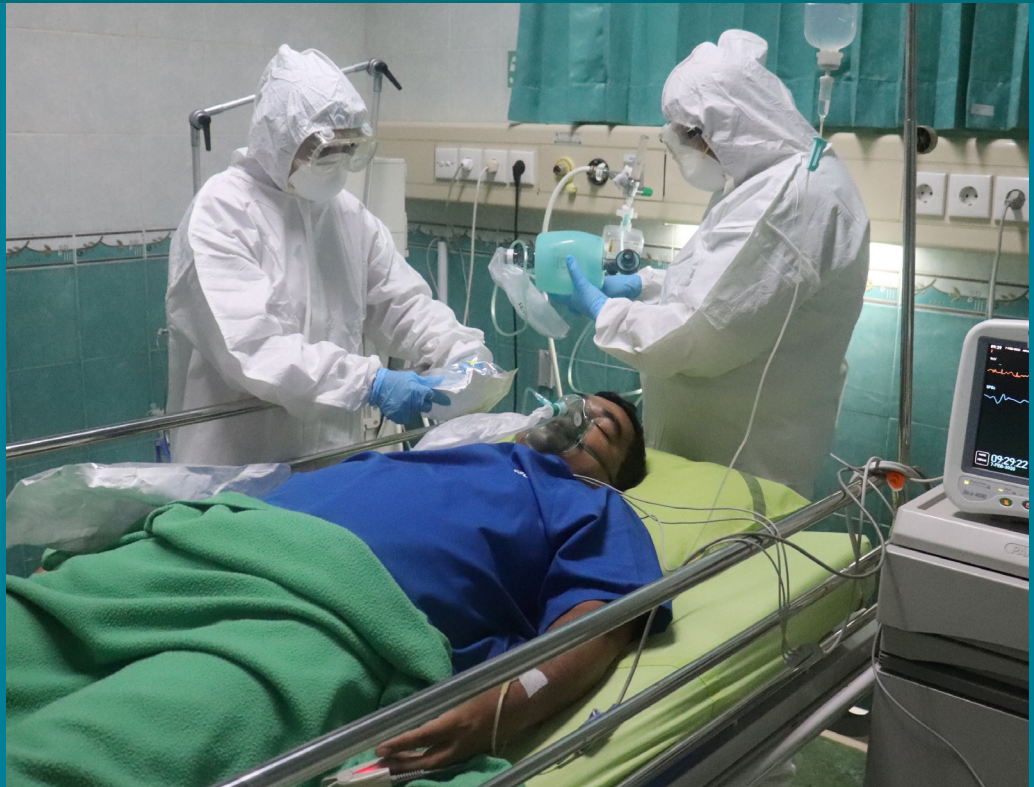

Increased risks for COVID-19 adverse outcomes for persons with substance use disorders

Redesigning public mental health systems post-COVID-19

Transforming mental health services with research leadership of people with lived experience

Autism grows up: Medicaid's role in serving adults on the spectrum
